# Supplementary material for: Liquid phase high shear exfoliated few-layered graphene for highly sensitive ascorbic acid electrochemical sensors
Source: Royal Society of Chemistry journal article supplement (doi:10.1039/d2ma00666a), 2022-01-01
Supplement: d2ma00666a1.pdf [file d2ma00666a1.pdf]

## Liquid phase high shear exfoliated few-layered graphene for highly sensitive Ascorbic Acid electrochemical sensors

Ramu Banavath<sup>1\*</sup>, Anand Abhinav<sup>1</sup>, Siva Sankar Nemala<sup>1</sup>, Rohit Srivastava<sup>2</sup>, Parag Bhargava<sup>1\*</sup>

1 - Particulate Materials Laboratory, Department of Metallurgical Engineering and Materials Science, IIT Bombay, 400076.

2 - Nanobios Laboratory, Department of Biosciences and Bioengineering, IIT Bombay, 400076.

Corresponding Authors: - Ramu Banavath ( [banavathramu1289@gmail.com](mailto:banavathramu1289@gmail.com) ), Parag Bhargava ( [pbhargava@iitb.ac.in](mailto:pbhargava@iitb.ac.in) )

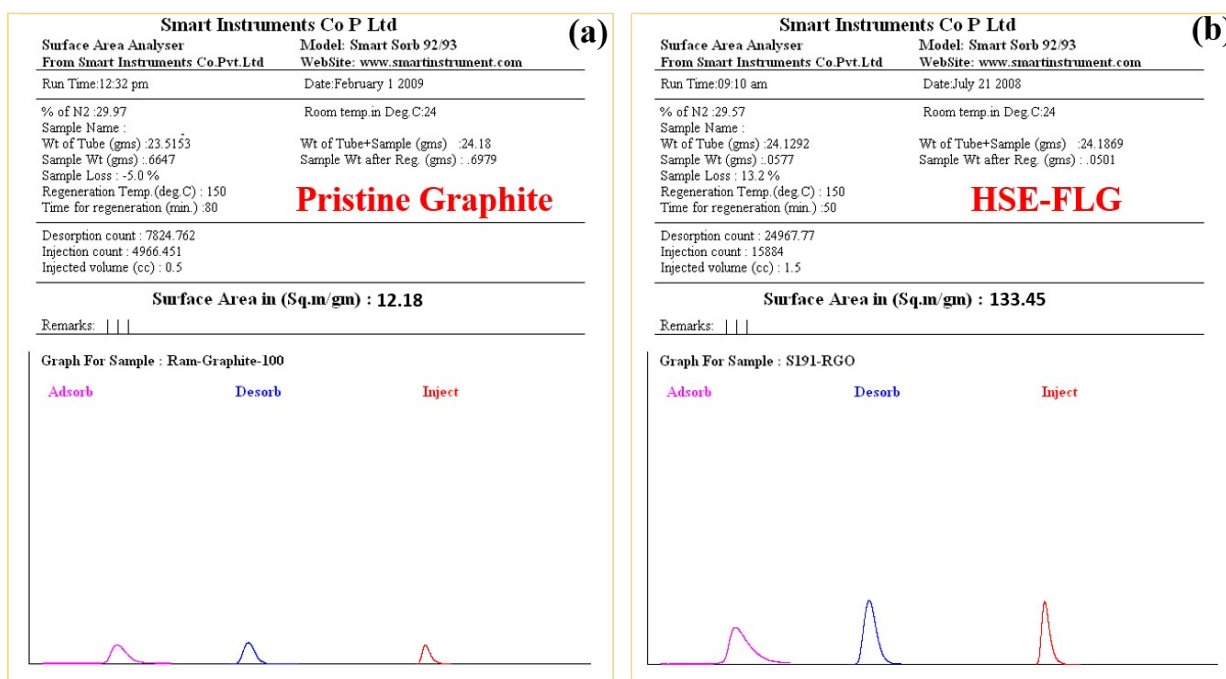

Figure S 1: - BET Specific surface area of pristine graphite and exfoliated graphene.

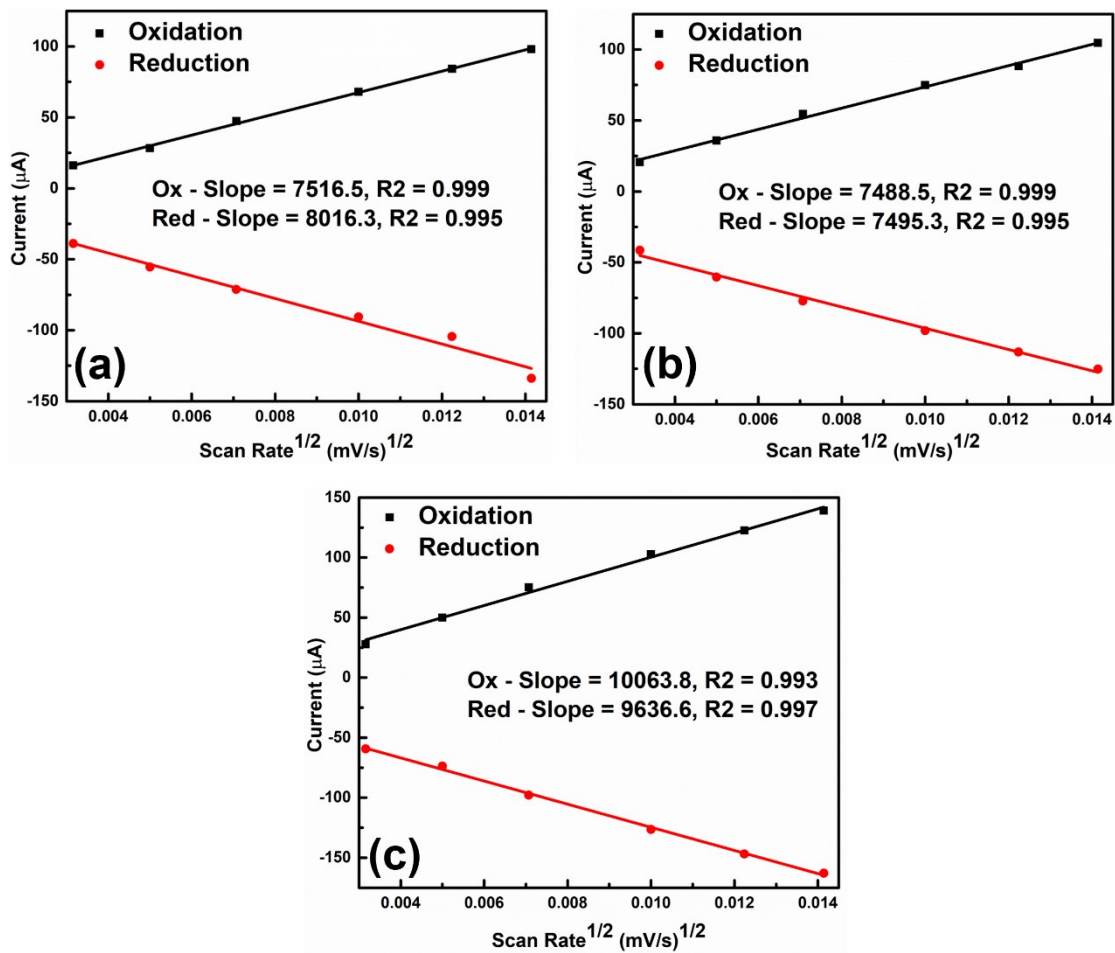

**Figure S 2:** - Square root of scan rate vs current linearity graphs for, (a) Blank GCE, (b) Pristine Graphite, and (c) HSE-FLG.

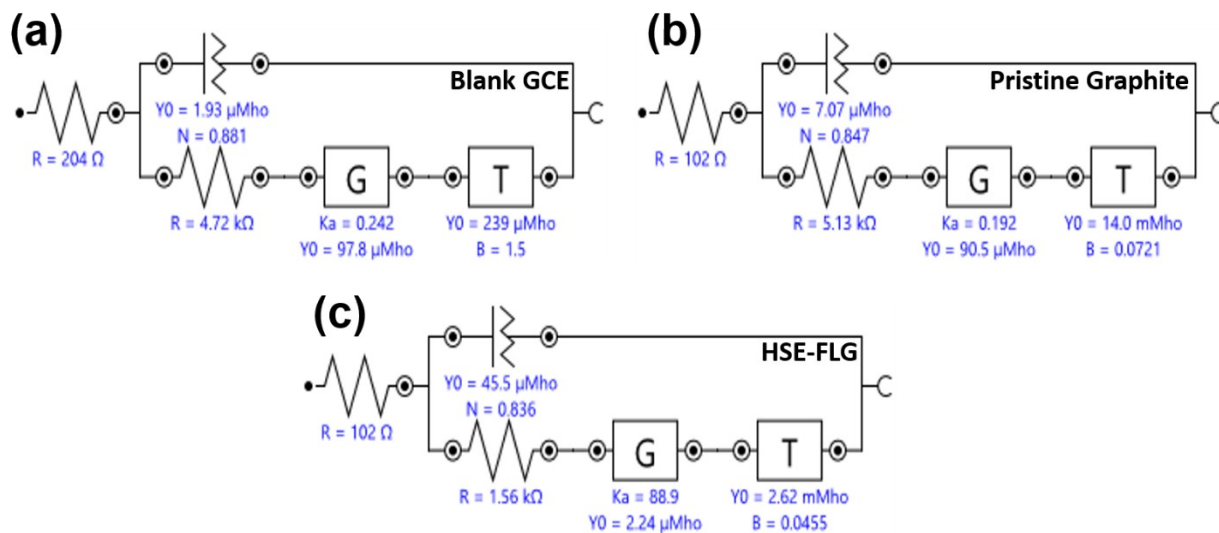

Figure S 3: - Equivalent circuits for the simulated EIS plots of modified GCEs.

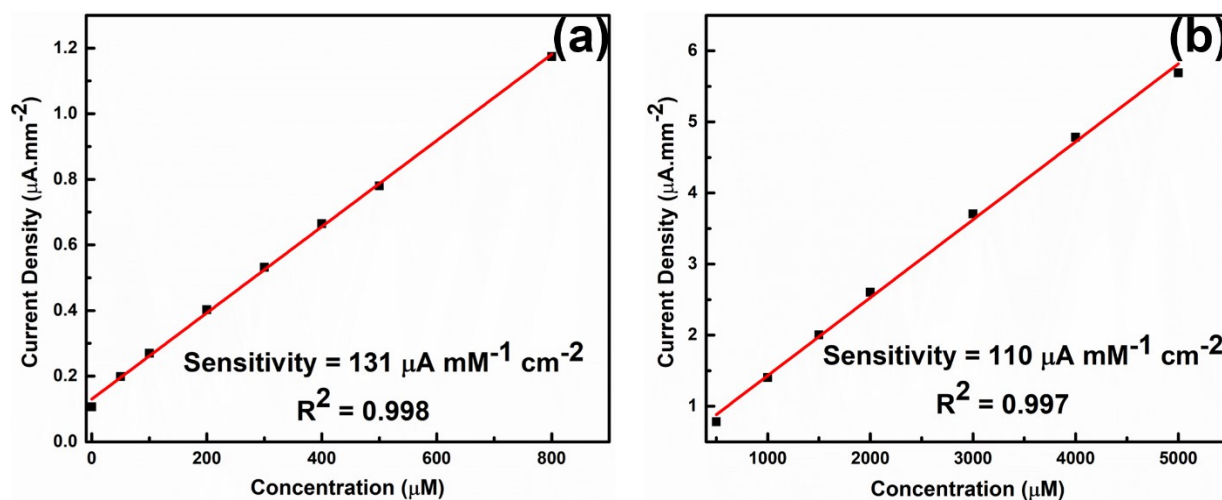

Figure S 4: - Calibration plots of LSVs for HSE-FLG based AA sensor at higher concentrations of AA.

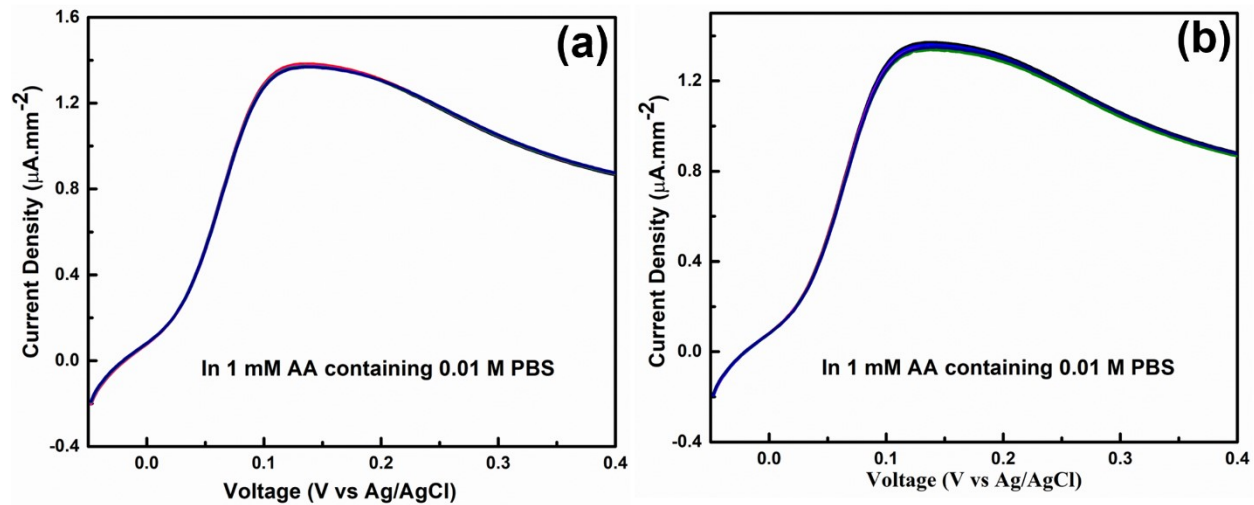

Figure S 5: - LSV plots for (a) repeatability and (b) reproducibility results.

Table S 1: - Real samples analysis of HSE-FLG based AA sensor for Vitamin C supplement.

| Concentration of AA ( $\mu\text{M}$ ) | Output Current Density in PBS ( $\mu\text{A}\cdot\text{mm}^{-2}$ ) | Output Current Density in Vitamin C Supplement ( $\mu\text{A}\cdot\text{mm}^{-2}$ ) | Percentage of recovery (%) | % RCD |
|---------------------------------------|--------------------------------------------------------------------|-------------------------------------------------------------------------------------|----------------------------|-------|
| 20                                    | 0.0965                                                             | 0.1036                                                                              | 107.3                      | 7.1   |
| 30                                    | 0.3161                                                             | 0.3061                                                                              | 96.8                       | 3.3   |
| 50                                    | 0.5931                                                             | 0.5579                                                                              | 94.1                       | 5.8   |
